# Supplementary material for: “Clickable” bacterial poly(γ-glutamic acid)
Source: Royal Society of Chemistry journal article supplement (doi:10.1039/d0py00843e), 2020-01-01

*Supporting Information for:*

## “Clickable” Bacterial Poly( $\gamma$ -Glutamic Acid)

*Valeria Cedrati, Aurora Pacini, Andrea Nitti, Antxon Martínez de Ilarduya, Sebastián*

*Muñoz-Guerra, Amitav Sanyal, Dario Pasini*

## Compound S1

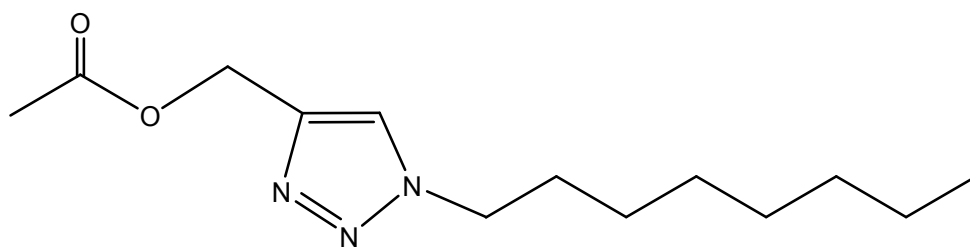

Propargyl acetate (147 mg, 1.5 mmol) was added to compound **7** (278 mg, 1.8 mmol) dissolved in 10 mL of DMF. CuSO<sub>4</sub> (49 mg, 0.3 mmol), Na Ascorbate (120 mg, 0.6 mmol), and, slowly, 1 mL of H<sub>2</sub>O, 10% relative to the solvent, were added to the solution. The solution was stirred for 18 h at room temperature. H<sub>2</sub>O (20 mL) were added to the mixture and it was then extracted with AcOEt (3x25 mL), dried with Na<sub>2</sub>SO<sub>4</sub>, filtered and evaporated. The product was purified using column chromatography (SiO<sub>2</sub>; hexane/AcOEt: 7/3) to give **S1** as a yellowish solid (335 mg, 88%). <sup>1</sup>H NMR (CD<sub>3</sub>SOCD<sub>3</sub>, 200 MHz) δ = 8.13 (s, 1H; -CH- triazole), 5.08 (s, 2H; -COOCH<sub>2</sub>-), 4.33 (t, 2H; -NCH<sub>2</sub>-), 2.01 (s, 3H; CH<sub>3</sub>COO-), 1.81 (m, 2H; -CH<sub>2</sub>CH<sub>2</sub>N-), 1.23 (s, 10H; -CH<sub>2</sub>CH<sub>2</sub>- chain), 0.84 (t, 3H; CH<sub>3</sub>CH<sub>2</sub>-). <sup>13</sup>C NMR (CD<sub>3</sub>SOCD<sub>3</sub>, 75 MHz) δ = 170.1 (C=O), 141.7 (C<sub>quat</sub>), 124.5 (CH triazole), 57.1 (CH<sub>2</sub>), 49.3 (CH<sub>2</sub>), 31.1 (CH<sub>2</sub>), 29.6 (CH<sub>2</sub>), 28.5 (CH<sub>2</sub>), 28.3 (CH<sub>2</sub>), 25.8 (CH<sub>2</sub>), 22.0 (CH<sub>2</sub>), 20.6 (CH<sub>3</sub>), 13.9 (CH<sub>3</sub>).

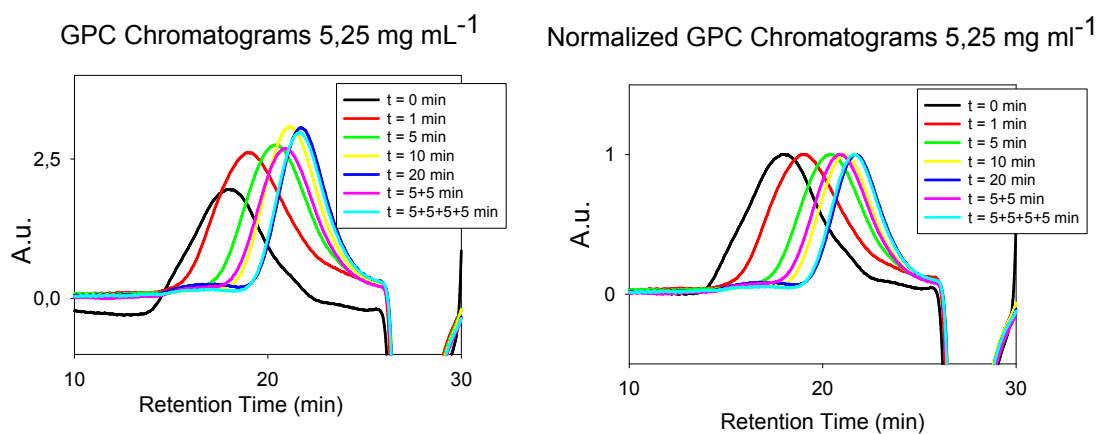

**Figure S1.** GPC chromatograms (right: original traces, and left: normalized traces with respect to polymeric peak height) as a function of sonication time for a  $\gamma$ -PGA solution ( $0.033 \text{ M}$  in  $\text{H}_2\text{O}$ ).

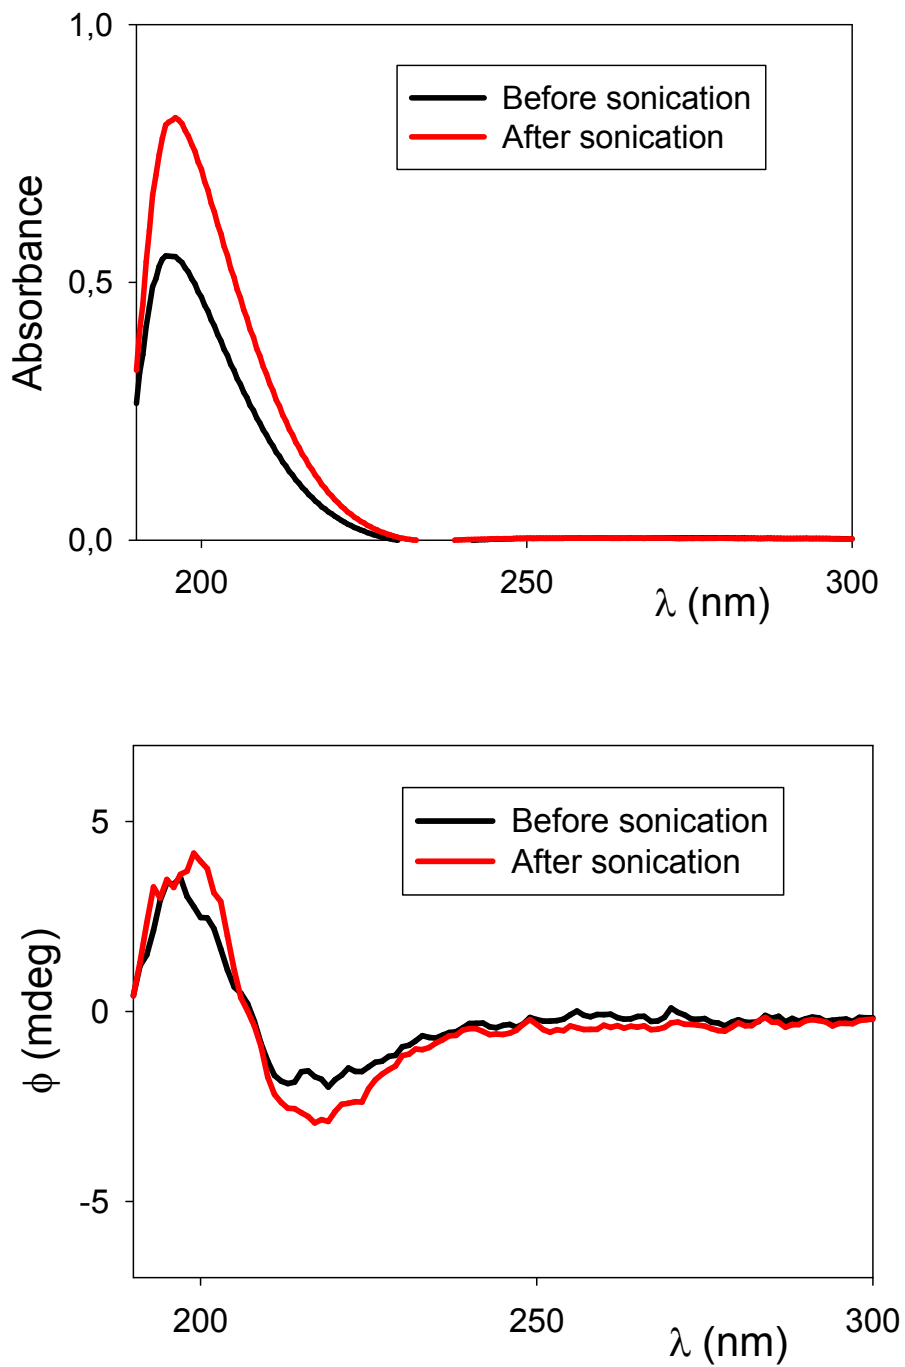

**Figure S2.** UV spectra (top) and CD spectra (bottom) of a  $\gamma$ -PGA solution (0.0002 M in H<sub>2</sub>O) before and after sonication.

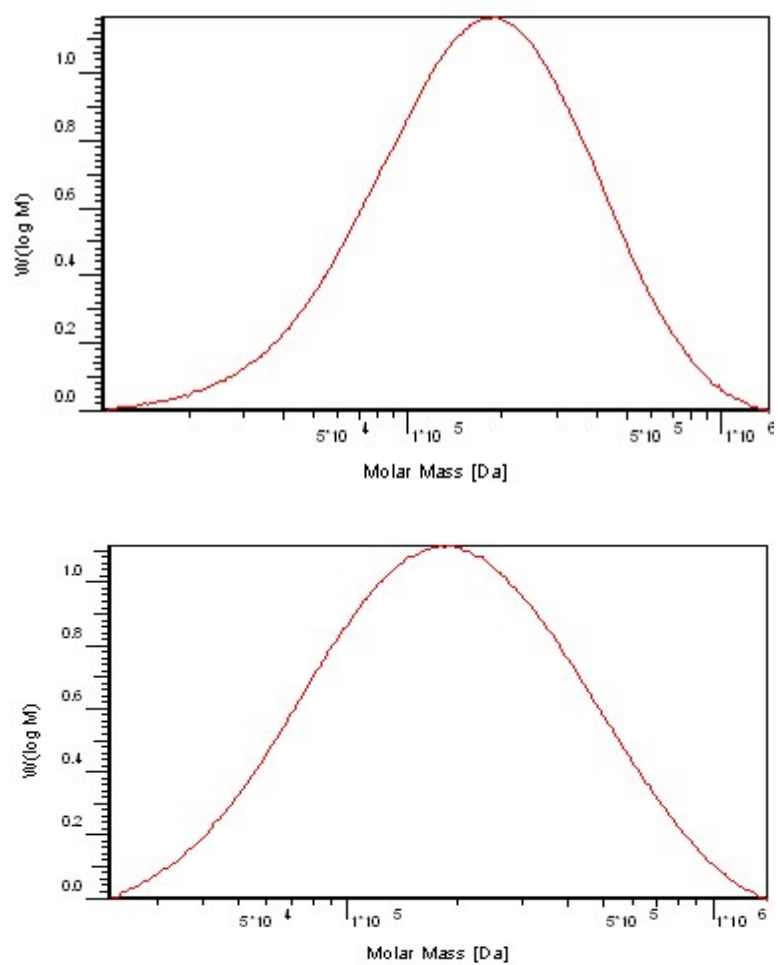

**Figure S3.** Representative GPC traces (DMAc) of samples **3d** (top) and **8** (bottom)

## Copies of NMR Spectra for Polymers.

### Polymer 3d

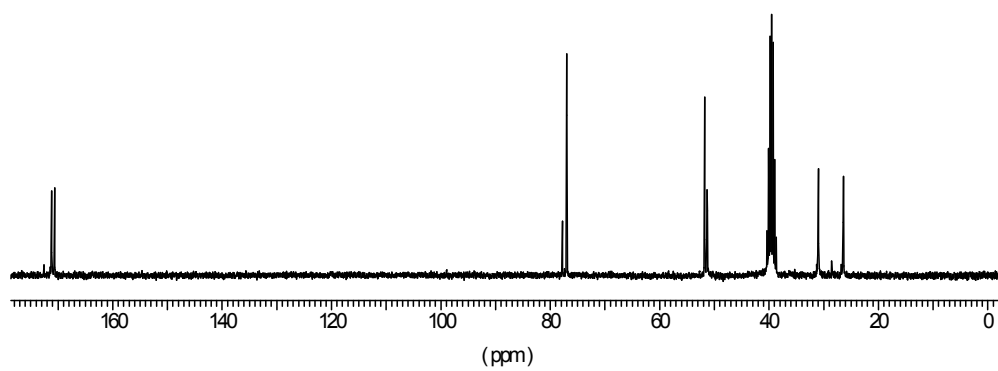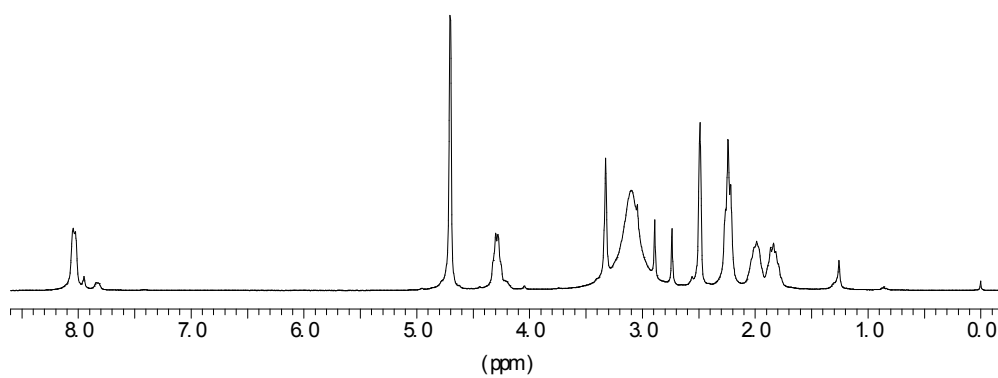

### Polymer 5

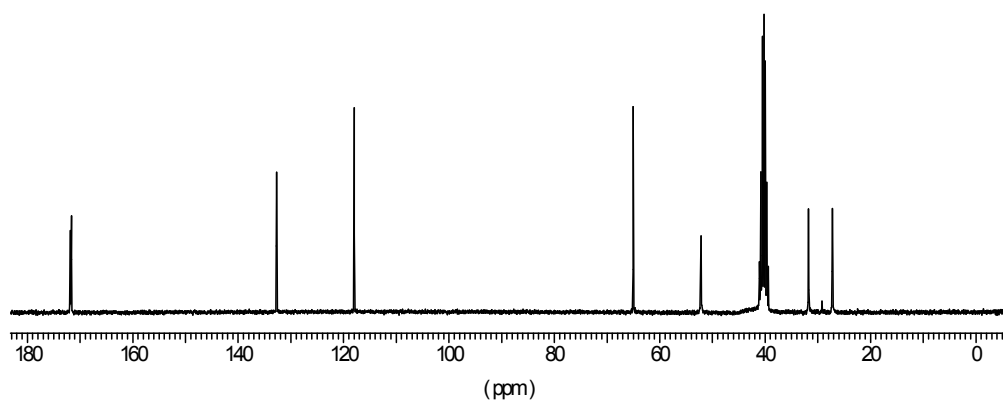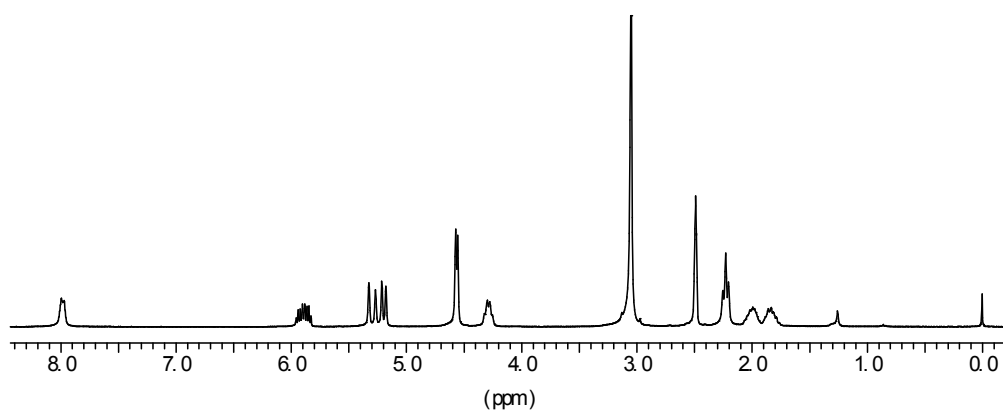

### Polymer 6

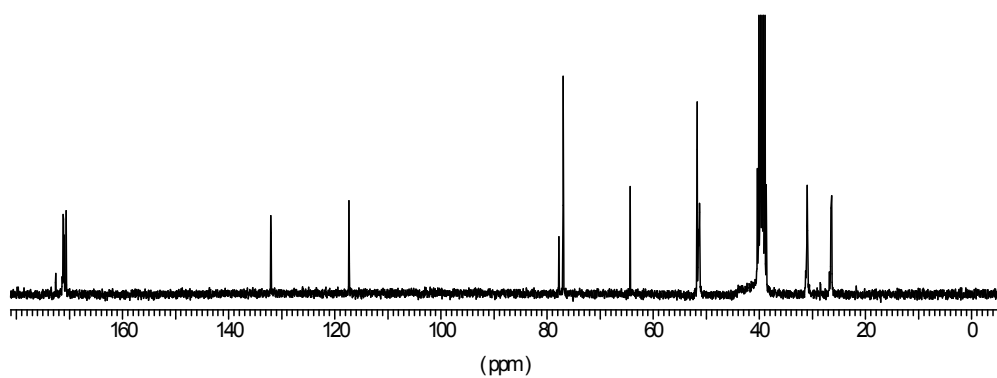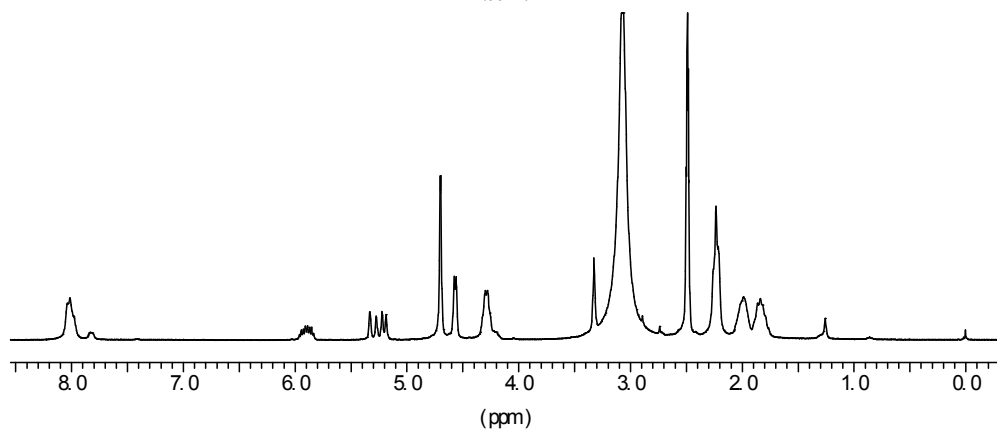

# Polymer 8

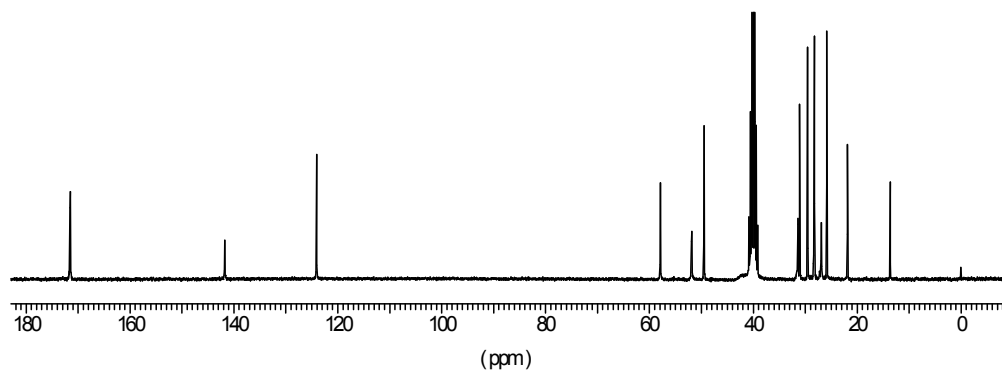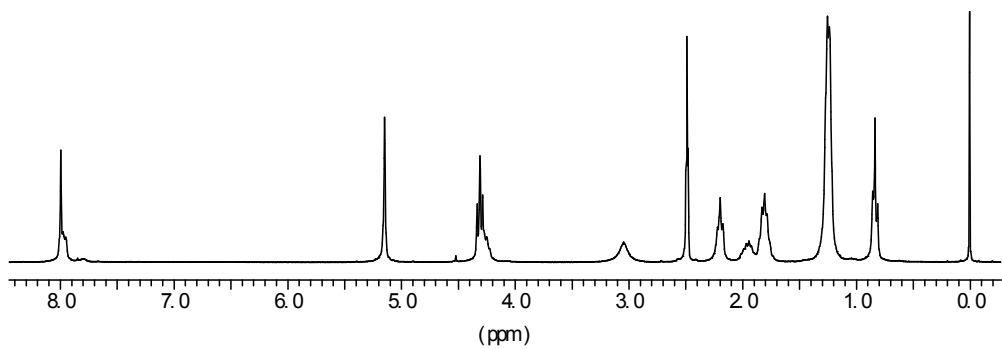



# Compound S1

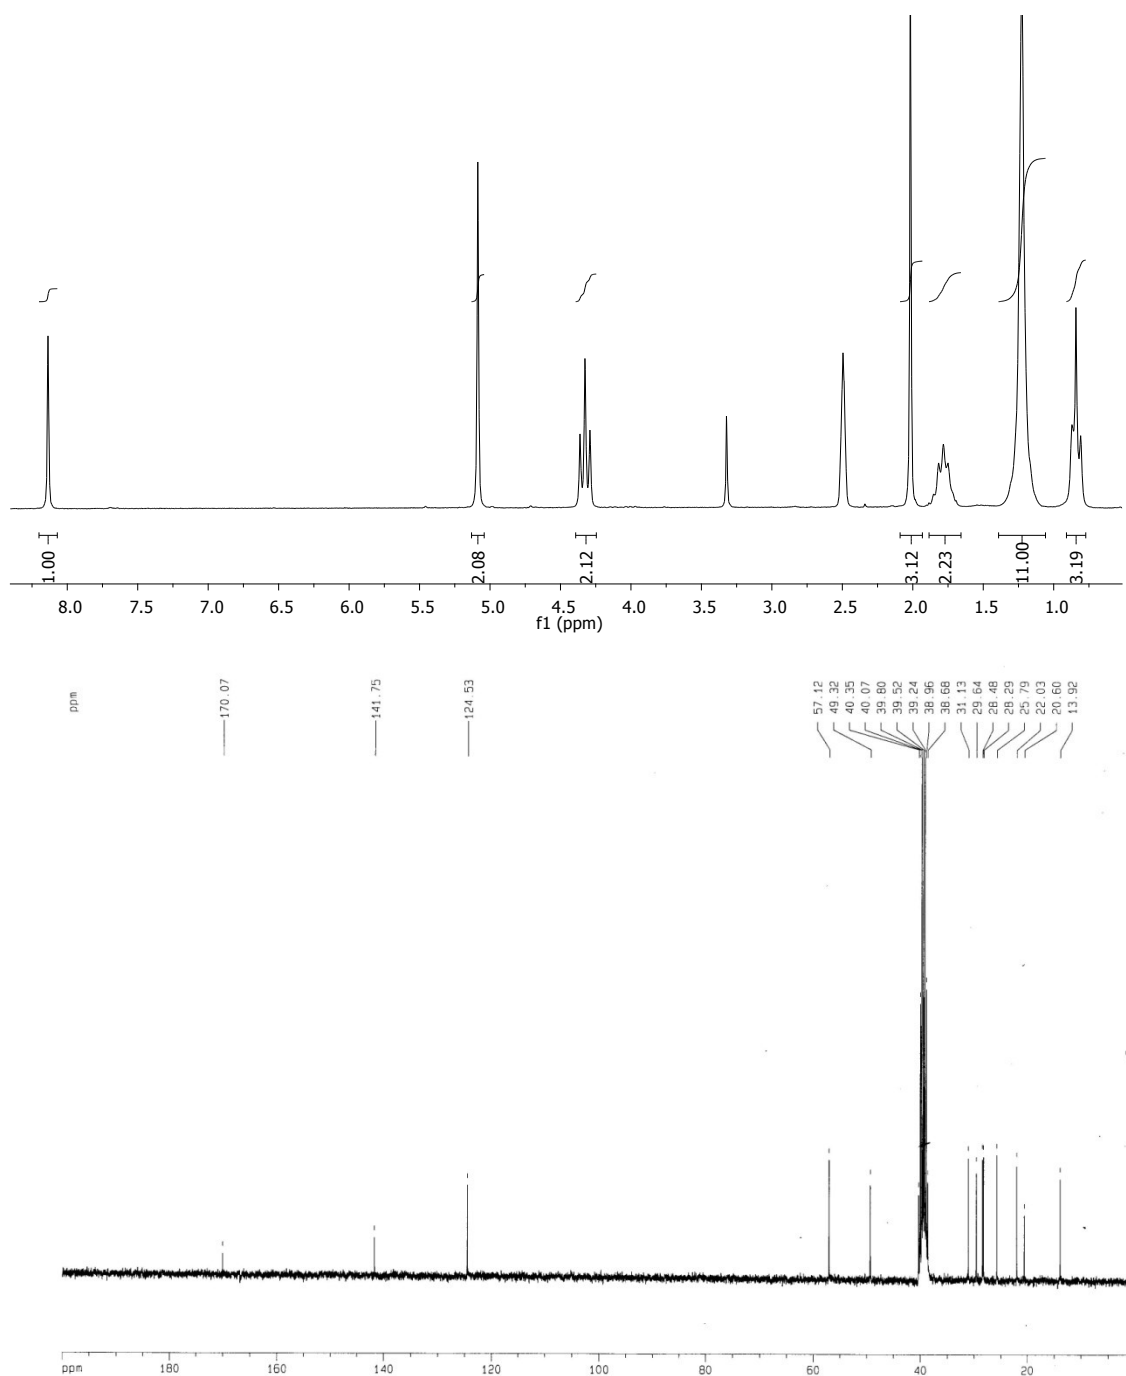

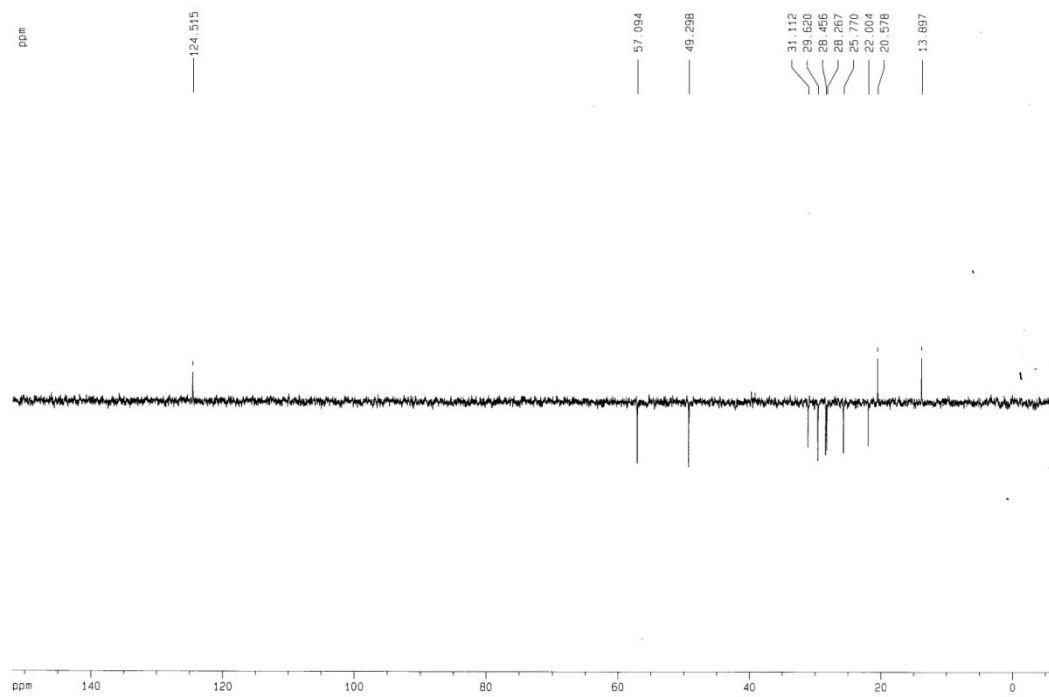

Supplement: d0py00843e1.pdf [file d0py00843e1.pdf]
